# Supplementary material
Source: Research Square preprint supplement (doi:10.21203/rs.3.rs-8989518/v1)
Supplement: Supplementary file 1 [file 28ae8ddf861a5a3f4f54af77.pdf]

**Table 1 Baseline characteristics between the case group and the control group**

| Baseline characteristic               | Case group<br>(n=130)        | Control group<br>(n=265)     | t/Z/X <sup>2</sup><br>value | P value    |
|---------------------------------------|------------------------------|------------------------------|-----------------------------|------------|
| Age (years)                           | 31.25(28.75,33.00)           | 30.00(28.00,32.00)           | -<br>1.76                   | 0.079      |
| Gestational (W)                       |                              |                              | 156.<br>4                   | <0.00<br>1 |
| 24 <sup>+0</sup> ~ 34 <sup>+6</sup> W | 64(49.23%)                   | 35(13.21%)                   |                             |            |
| 35 <sup>+0</sup> ~ 36 <sup>+6</sup> W | 48(36.92%)                   | 116(43.77%)                  |                             |            |
| 37 <sup>+0</sup> ~ 40 <sup>+6</sup> W | 18(13.85%)                   | 114(43.02%)                  |                             |            |
| Mode of delivery                      |                              |                              | 132.<br>47                  | <0.00<br>1 |
| Vaginal delivery                      | 41(31.54%)                   | 233(87.92%)                  |                             |            |
| Cesarean section                      | 89(68.46%)                   | 32(12.08%)                   |                             |            |
| Neonatal sex                          |                              |                              | 1.54                        | 0.214      |
| Male                                  | 62(47.69)                    | 144(54.34)                   |                             |            |
| Female                                | 68(52.31)                    | 121(45.66)                   |                             |            |
| Birth weight (g)                      | 2700.50(2270.00,<br>2964.25) | 3110.00(2930.00,334<br>0.00) | -<br>11.14                  | <0.00<br>1 |
| Apgar score                           |                              |                              | 18.2<br>4                   | <0.00<br>1 |
| 5-minute ≤ 7                          | 39(30.00%)                   | 33(12.45%)                   |                             |            |
| 5-minute > 7                          | 91(70.00%)                   | 232(87.55%)                  |                             |            |
| NRDS                                  |                              |                              | 35.6<br>7                   | <0.00<br>1 |
| Yes                                   | 41(31.54%)                   | 21(7.92%)                    |                             |            |
| No                                    | 89(68.46%)                   | 244(92.08%)                  |                             |            |

W weeks, g grams

**Table 2 Comparison of multimodal ultrasound parameters between the two groups**

| Ultrasound parameter                 | Case group (n=130)    | Control group |
|--------------------------------------|-----------------------|---------------|
| Left lung area (cm <sup>2</sup> )    | 7.32(5.98,9.02)       | 8.48(5.93     |
| Right lung area (cm <sup>2</sup> )   | 7.42(6.13,9.19)       | 8.92(6.93     |
| Left lung volume (cm <sup>3</sup> )  | 10.57(7.62,14.06)     | 19.64(13.1    |
| Right lung volume (cm <sup>3</sup> ) | 15.39(10.38,19.21)    | 27.74(19.5    |
| Pulmonary artery diameter (mm)       | 6.24±1.31             | 6.40±         |
| AT(ms)                               | 34.00(29.00,45.50)    | 42.61(37.9    |
| ET(ms)                               | 179.00(171.00,184.00) | 177.15(175.0  |
| AT/ET                                | 0.19(0.16,0.25)       | 0.23(0.2      |
| UA                                   |                       |               |
| S/D                                  | 3.49±0.85             | 2.47±         |
| PI                                   | 1.24±0.27             | 0.85±         |
| RI                                   | 0.73±0.08             | 0.59±         |
| MCA                                  |                       |               |
| S/D                                  | 3.18±0.78             | 4.60±         |
| PI                                   | 1.16±0.27             | 1.54±         |
| RI                                   | 0.66±0.06             | 0.77±         |
| PSV(cm/s)                            | 47.33±5.82            | 56.83±        |

Note: cm<sup>2</sup> square centimeters, cm<sup>3</sup> cubic centimeters, mm Millimeter, ms milliseconds, cm/s centimeters per second, AT acceleration time, ET ejection time, UA umbilical artery, S/D systolic/diastolic ratio, PI pulsatility index, RI resistance index, MCA middle cerebral artery, PSV peak systolic velocity

**Table 3 Characteristics of multimodal ultrasound parameters in the control group by gestational age**

| Ultrasound parameter                | Group A (n=35) | Group B (n=116) | Group C (n=114) | F/X <sup>2</sup> value | P v alue |
|-------------------------------------|----------------|-----------------|-----------------|------------------------|----------|
| Left lung area (cm <sup>2</sup> )   | 6.20±1.20      | 8.48±1.35       | 11.09±1.50      | 24                     | <0.001   |
| Right lung area (cm <sup>2</sup> )  | 6.85±1.45      | 9.65±1.60       | 11.93±1.75      | 27                     | <0.001   |
| Left lung volume (cm <sup>3</sup> ) | 15.80±         | 23.64±          | 28.20±          | 21                     | <0.      |

|                                      |           |           |           |      |     |
|--------------------------------------|-----------|-----------|-----------|------|-----|
|                                      | 2.50      | 3.80      | 4.50      | 5.82 | 001 |
| Right lung volume (cm <sup>3</sup> ) | 18.50±    | 31.80±    | 37.60±    | 31   | <0. |
|                                      | 3.00      | 4.50      | 5.50      | 2.76 | 001 |
| Pulmonary artery diameter (mm)       | 5.43±0.69 | 6.90±1.10 | 7.89±0.75 | 15   | <0. |
|                                      |           |           |           | 6.82 | 001 |
| AT(ms)                               | 37.41±    | 44.08±    | 47.34±    | 39   | <0. |
|                                      | 3.73      | 1.50      | 1.88      | 8.45 | 001 |
| ET(ms)                               | 178.52±   | 177.03±   | 180.23±   | 5.   | 0.7 |
|                                      | 4.54      | 6.15      | 2.39      | 23   | 99  |
| AT/ET                                | 0.21±0.02 | 0.24±0.02 | 0.26±0.01 | 89   | <0. |
|                                      |           |           |           | .67  | 001 |
| UA                                   |           |           |           |      |     |
| S/D                                  | 2.68±0.40 | 2.40±0.31 | 2.33±0.34 | 21   | <0. |
|                                      |           |           |           | .45  | 001 |
| PI                                   | 0.92±0.12 | 0.83±0.12 | 0.81±0.14 | 18   | <0. |
|                                      |           |           |           | .92  | 001 |
| RI                                   | 0.63±0.05 | 0.58±0.05 | 0.57±0.06 | 38   | <0. |
|                                      |           |           |           | .76  | 001 |
| MCA                                  |           |           |           |      |     |
| S/D                                  | 5.50±2.03 | 4.46±1.30 | 3.42±0.87 | 45   | <0. |
|                                      |           |           |           | .34  | 001 |
| PI                                   | 1.77±0.31 | 1.51±0.27 | 1.27±0.23 | 80   | <0. |
|                                      |           |           |           | .18  | 001 |
| RI                                   | 0.82±0.06 | 0.77±0.04 | 0.71±0.05 | 0.   | <0. |
|                                      |           |           |           | 05   | 001 |
| PSV(cm/s)                            | 52.5±7.50 | 60.0±8.0  | 58.0±7.0  | 18   | <0. |
|                                      |           |           |           | .91  | 001 |

Note: cm<sup>2</sup> square centimeters, cm<sup>3</sup> cubic centimeters, mm Millimeter, ms milliseconds, cm/s centimeters per second, AT acceleration time, ET ejection time, UA umbilical artery, S/D systolic/diastolic ratio, PI pulsatility index, RI resistance index, MCA middle cerebral artery, PSV peak systolic velocity

**Table 4 Characteristics of multimodal ultrasound parameters in the case group by gestational age**

| Ultrasound parameter | Group A (n=35) | Group B (n=116) | Group C (n=114) | F/X <sup>2</sup> value | P v alue |
|----------------------|----------------|-----------------|-----------------|------------------------|----------|
|----------------------|----------------|-----------------|-----------------|------------------------|----------|

|                                      |                |                |               |      |        |
|--------------------------------------|----------------|----------------|---------------|------|--------|
| Left lung area (cm <sup>2</sup> )    | 5.79 ± 1.94    | 8.14 ± 1.83    | 9.19 ± 1.89   | 85.3 | <0.001 |
| Right lung area (cm <sup>2</sup> )   | 6.55 ± 2.55    | 8.60 ± 2.75    | 10.10 ± 2.62  | 42.1 | <0.001 |
| Left lung volume (cm <sup>3</sup> )  | 9.89 ± 4.99    | 14.50 ± 6.49   | 16.61 ± 2.90  | 18.7 | <0.001 |
| Right lung volume (cm <sup>3</sup> ) | 14.95 ± 5.55   | 17.00 ± 7.75   | 19.10 ± 4.62  | 25.4 | <0.001 |
| Pulmonary artery diameter (mm)       | 5.39 ± 0.73    | 6.62 ± 1.21    | 7.34 ± 0.87   | 98.9 | <0.001 |
| AT(ms)                               | 32.65 ± 7.21   | 36.70 ± 10.24  | 46.94 ± 1.61  | 98.4 | <0.001 |
| ET(ms)                               | 179.52 ± 18.96 | 178.03 ± 18.94 | 175.11 ± 4.31 | 0.35 | 0.799  |
| AT/ET                                | 0.18 ± 0.04    | 0.20 ± 0.06    | 0.26 ± 0.01   | 89.6 | <0.001 |
| UA                                   |                |                |               |      |        |
| S/D                                  | 3.80 ± 0.90    | 3.34 ± 0.72    | 3.00 ± 0.65   | 21.4 | <0.001 |
| PI                                   | 1.35 ± 0.25    | 1.21 ± 0.25    | 1.10 ± 0.25   | 18.9 | <0.001 |
| RI                                   | 0.75 ± 0.08    | 0.72 ± 0.07    | 0.70 ± 0.07   | 8.76 | <0.001 |
| MCA                                  |                |                |               |      |        |
| S/D                                  | 3.50 ± 0.80    | 3.20 ± 0.70    | 2.60 ± 0.60   | 25.3 | <0.001 |
| PI                                   | 1.25 ± 0.30    | 1.15 ± 0.22    | 0.95 ± 0.20   | 30.1 | <0.001 |
| RI                                   | 0.68 ± 0.06    | 0.65 ± 0.05    | 0.60 ± 0.05   | 35.6 | <0.001 |
| PSV(cm/s)                            | 45.0 ± 4.30    | 50.0 ± 5.25    | 45.0 ± 5.30   | 28.9 | <0.001 |

Note: cm<sup>2</sup> square centimeters, cm<sup>3</sup> cubic centimeters, mm Millimeter, ms milliseconds, cm/s centimeters per second, AT acceleration time, ET ejection time, UA umbilical artery, S/D systolic/diastolic ratio, PI pulsatility index, RI resistance index, MCA middle cerebral artery, PSV peak systolic velocity

**Table 5 Comparison of data between the NRDS group and the non-NRDS group**

| Ultrasound | NRDS group (n=42) | non-NRDS group | t/Z/X | P val |
|------------|-------------------|----------------|-------|-------|
|------------|-------------------|----------------|-------|-------|

| parameter                             |                       | (n=353)               | <sup>2</sup> value | ue     |
|---------------------------------------|-----------------------|-----------------------|--------------------|--------|
| Age (years)                           | 31.25(28.75,33.00)    | 30.00(28.00,32.00)    | -1.76              | 0.079  |
| Gestational (W)                       |                       |                       | 156.4              | <0.001 |
| 24 <sup>+0</sup> ~ 34 <sup>+6</sup> W | 64(49.23%)            | 35(13.21%)            |                    |        |
| 35 <sup>+0</sup> ~ 36 <sup>+6</sup> W | 48(36.92%)            | 116(43.77%)           |                    |        |
| 37 <sup>+0</sup> ~ 40 <sup>+6</sup> W | 18(13.85%)            | 114(43.02%)           |                    |        |
| HDP                                   |                       |                       | 35.67              | <0.001 |
| yes                                   | 41(31.54%)            | 21(7.92%)             |                    |        |
| no                                    | 89(68.46%)            | 244(92.08%)           |                    |        |
| Left lung area (cm <sup>2</sup> )     | 7.32(5.98,9.02)       | 8.48(5.93,11.45)      | -3.85              | <0.001 |
| Right lung area (cm <sup>2</sup> )    | 7.42(6.13,9.19)       | 8.92(6.93,12.06)      | -4.96              | <0.001 |
| Left lung volume (cm <sup>3</sup> )   | 10.57(7.62,14.06)     | 19.64(13.18,28.83)    | 10.57              | <0.001 |
| Right lung volume (cm <sup>3</sup> )  | 15.39(10.38,19.21)    | 27.74(19.52,38.45)    | 10.94              | <0.001 |
| Pulmonary artery diameter (mm)        | 6.24±1.31             | 6.40±1.27             | 1.11               | 0.267  |
| AT(ms)                                | 34.00(29.00,45.50)    | 42.61(37.96,44.63)    | -5.27              | <0.001 |
| ET(ms)                                | 179.00(171.00,184.00) | 177.15(175.00,181.00) | -1.29              | 0.199  |
| AT/ET                                 | 0.19(0.16,0.25)       | 0.23(0.21,0.24)       | -5.36              | <0.001 |
| UA                                    |                       |                       |                    |        |
| S/D                                   | 3.49±0.85             | 2.47±0.39             | 15.02              | <0.001 |
| PI                                    | 1.24±0.27             | 0.85±0.13             | 18.3               | <0.001 |

|           |                  |                  |       |     |     |
|-----------|------------------|------------------|-------|-----|-----|
|           |                  |                  |       | 9   | 001 |
| RI        | $0.73 \pm 0.08$  | $0.59 \pm 0.06$  | 20.1  | <0. |     |
|           |                  |                  | 4     | 001 |     |
| MCA       |                  |                  |       |     |     |
| S/D       | $3.18 \pm 0.78$  | $4.60 \pm 1.65$  | 15.0  | <0. |     |
|           |                  |                  | 2     | 001 |     |
| PI        | $1.16 \pm 0.27$  | $1.54 \pm 0.31$  | 18.3  | <0. |     |
|           |                  |                  | 9     | 001 |     |
| RI        | $0.66 \pm 0.06$  | $0.77 \pm 0.07$  | -0.11 | <0. |     |
|           |                  |                  |       | 001 |     |
| PSV(cm/s) | $47.33 \pm 5.82$ | $56.83 \pm 8.37$ | -9.5  | <0. |     |
|           |                  |                  |       | 001 |     |

Note: W weeks, cm<sup>2</sup> square centimeters, cm<sup>3</sup> cubic centimeters, mm millimeter, ms milliseconds, cm/s centimeters per second, AT acceleration time, ET ejection time, UA umbilical artery, S/D systolic/diastolic ratio, PI pulsatility index, RI resistance index, MCA middle cerebral artery, PSV peak systolic velocity

**Table 6 Univariate logistic regression analysis of NRDS group and non-NRDS group**

| Parameter                               | $\beta$<br>coefficient | Standard<br>error | Wald<br>value | OR<br>value | 95%<br>CI        | P value |
|-----------------------------------------|------------------------|-------------------|---------------|-------------|------------------|---------|
| Age (years)                             | 0.04                   | 0.04              | 1.00          | 1.04        | 0.96-<br>1.12    | 0.317   |
| Gestational<br>age                      | -0.45                  | 0.08              | 31.64         | 0.64        | 0.55-<br>0.75    | <0.001  |
| HDP (Yes/No)                            | 3.76                   | 0.58              | 42.01         | 42.92       | 13.78-<br>133.70 | <0.001  |
| Left lung area<br>(cm <sup>2</sup> )    | -0.24                  | 0.05              | 22.09         | 0.79        | 0.71-<br>0.87    | <0.001  |
| Right lung<br>area (cm <sup>2</sup> )   | -0.28                  | 0.05              | 31.36         | 0.76        | 0.69-<br>0.83    | <0.001  |
| Left lung<br>volume (cm <sup>3</sup> )  | -0.21                  | 0.04              | 28.90         | 0.81        | 0.75-<br>0.88    | <0.001  |
| Right lung<br>volume (cm <sup>3</sup> ) | -0.22                  | 0.04              | 30.25         | 0.80        | 0.74-<br>0.87    | <0.001  |

|                                |       |      |       |       |            |        |
|--------------------------------|-------|------|-------|-------|------------|--------|
| Pulmonary artery diameter (mm) | -0.08 | 0.07 | 1.32  | 0.92  | 0.80, 1.06 | 0.267  |
| AT(ms)                         | -0.08 | 0.02 | 20.25 | 0.92  | 0.89-0.96  | <0.001 |
| ET(ms)                         | -0.01 | 0.01 | 0.85  | 0.99  | 0.97-1.01  | 0.357  |
| AT/ET                          | -0.58 | 0.12 | 23.36 | 0.56  | 0.44-0.71  | <0.001 |
| UA                             |       |      |       |       |            |        |
| S/D                            | 1.09  | 0.20 | 29.75 | 2.96  | 2.00-4.39  | <0.001 |
| PI                             | 2.85  | 0.52 | 30.05 | 17.30 | 6.24-47.94 | <0.001 |
| RI                             | 2.85  | 0.51 | 31.24 | 17.36 | 6.38-47.20 | <0.001 |
| MCA                            |       |      |       |       |            |        |
| S/D                            | -0.21 | 0.13 | 2.61  | 0.81  | 0.63-1.05  | 0.106  |
| PI                             | -1.92 | 0.61 | 9.91  | 0.15  | 0.04-0.47  | <0.01  |
| RI                             | -4.71 | 1.09 | 18.70 | 0.01  | 0.00-0.09  | <0.001 |
| PSV(cm/s)                      | -0.16 | 0.03 | 25.60 | 0.85  | 0.80-0.90  | <0.001 |

Note: cm<sup>2</sup> square centimeters, cm<sup>3</sup> cubic centimeters, mm Millimeter, ms milliseconds, cm/s centimeters per second, AT acceleration time, ET ejection time,

UA umbilical artery, S/D systolic/diastolic ratio, PI pulsatility index, RI resistance index, MCA middle cerebral artery, PSV peak systolic velocity

**Table 7 Multivariate logistic regression analysis of NRDS group and non-NRDS group**

| Parameter       | $\beta$ coefficient | Standard error | Wald value | OR value | 95% CI    | P value |
|-----------------|---------------------|----------------|------------|----------|-----------|---------|
| Gestational age | -0.38               | 0.09           | 17.83      | 0.68     | 0.57-0.81 | <0.001  |

|                 |       |      |       |       |                |        |
|-----------------|-------|------|-------|-------|----------------|--------|
| HDP<br>(Yes/No) | 2.85  | 0.62 | 21.12 | 17.26 | 5.12-<br>58.21 | <0.001 |
| AT(ms)          | -0.06 | 0.02 | 9     | 0.94  | 0.90-<br>0.98  | 0.003  |
| UA-PI           | 2.12  | 0.58 | 13.35 | 8.33  | 2.67-<br>25.97 | <0.001 |
| MCA-PI          | -1.65 | 0.68 | 5.89  | 0.19  | 0.05-<br>0.72  | 0.015  |

Note: ms milliseconds, HDP hypertensive disorders of pregnancy, AT acceleration time, UA-PI umbilical artery-pulsatility index, MCA-PI middle cerebral artery-pulsatility index

**Table 8 Comparison of diagnostic performance between the combined NRDS prediction model and single indicators**

| Predictor        | AUC(%)                 | ACC(%)              | SEN(%)              | SPE(%)              |
|------------------|------------------------|---------------------|---------------------|---------------------|
| Prediction model | 0.828(0.798-<br>0.902) | 75.2(70.5-<br>79.9) | 80.1(75.2-<br>85.0) | 74.3(69.5-<br>79.1) |
| HDP<br>(Yes/No)  | 0.718(0.645-<br>0.791) | 74.8(70.1-<br>79.5) | 31.5(25.9-<br>37.1) | 76.2(71.4-<br>81.0) |
| Gestational age  | 0.752(0.685-<br>0.819) | 72.5(67.7-<br>77.3) | 71.4(66.0-<br>76.8) | 72.8(67.9-<br>77.7) |
| UA-PI            | 0.795(0.732-<br>0.858) | 76.8(72.1-<br>81.5) | 73.8(68.6-<br>79.0) | 77.5(72.8-<br>82.2) |
| MCA-PI           | 0.683(0.607-<br>0.759) | 68.5(63.5-<br>73.5) | 61.9(56.1-<br>67.7) | 70.2(65.2-<br>75.2) |
| AT (ms)          | 0.724(0.652-<br>0.796) | 71.3(66.4-<br>76.2) | 66.7(61.1-<br>72.3) | 72.6(67.7-<br>77.5) |

Note: ms milliseconds, HDP hypertensive disorders of pregnancy, UA-PI umbilical artery-pulsatility index, MCA-PI middle cerebral artery-pulsatility index

AT acceleration time, AUC area under the curve, ACC accuracy, SEN sensitivity, SPE specificity, Data in parentheses denote the 95% confidence interval.
